# Supplementary material for: High quality reference genomes for toxigenic and non-toxigenic Vibrio cholerae serogroup O139
Source: PubMed Central journal article supplement (PMC6458141; doi:10.1038/s41598-019-41883-x), 2019-04-10
Supplement: 41598_2019_41883_MOESM1_ESM.pdf [file 41598_2019_41883_MOESM1_ESM.pdf]

**Supplementary material for**  
**High quality reference genomes for toxigenic and non-toxigenic *Vibrio cholerae***  
**serogroup O139.**

Matthew J. Dorman, Daryl Domman, Muhammad Ikhtear Uddin, Salma Sharmin, Mokibul  
Hassan Afrad, Yasmin Ara Begum, Firdausi Qadri & Nicholas R. Thomson

These supplementary materials include:

**Table S1.** List of strains and genome sequences used in this study (attached .xls spreadsheet).

**Figures S1-S6.**

**Supplementary references.** Additional references for cited data and supplementary figures.

Additional materials that support this study are available in Figshare:

<https://dx.doi.org/10.6084/m9.figshare.6480266>

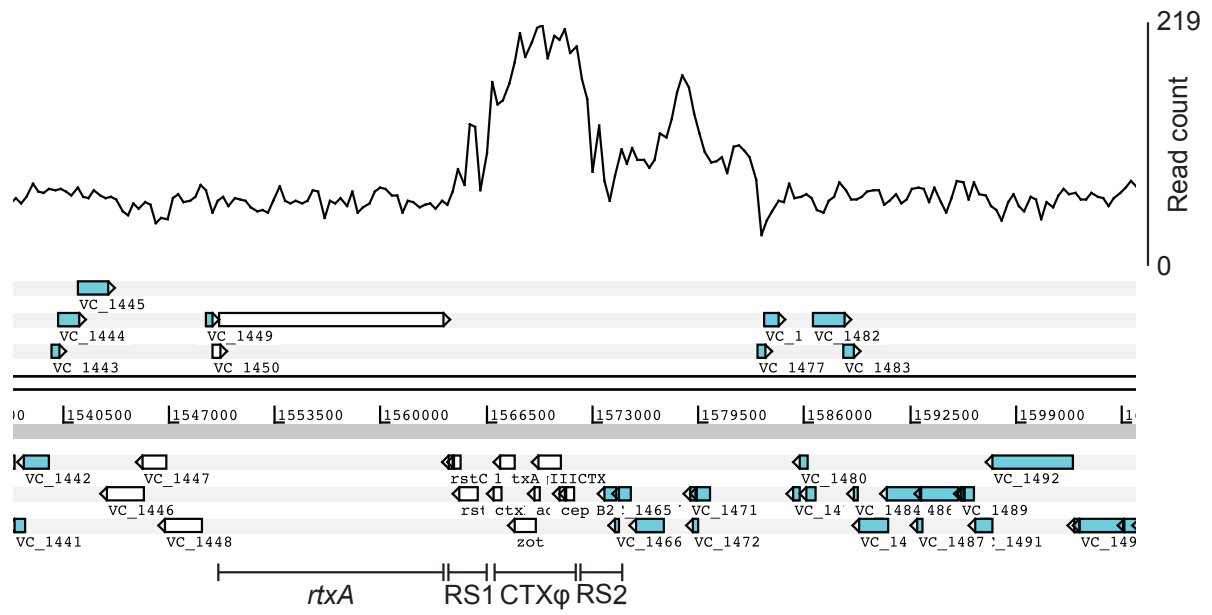

**Figure S1. Confirmation of the duplication of the CTX $\phi$  bacteriophage in 48853\_H01.**

Short reads for 48853\_H01 were mapped against the N16961 reference genome (see

Methods). Mapping data were visualised using Artemis <sup>82</sup>.

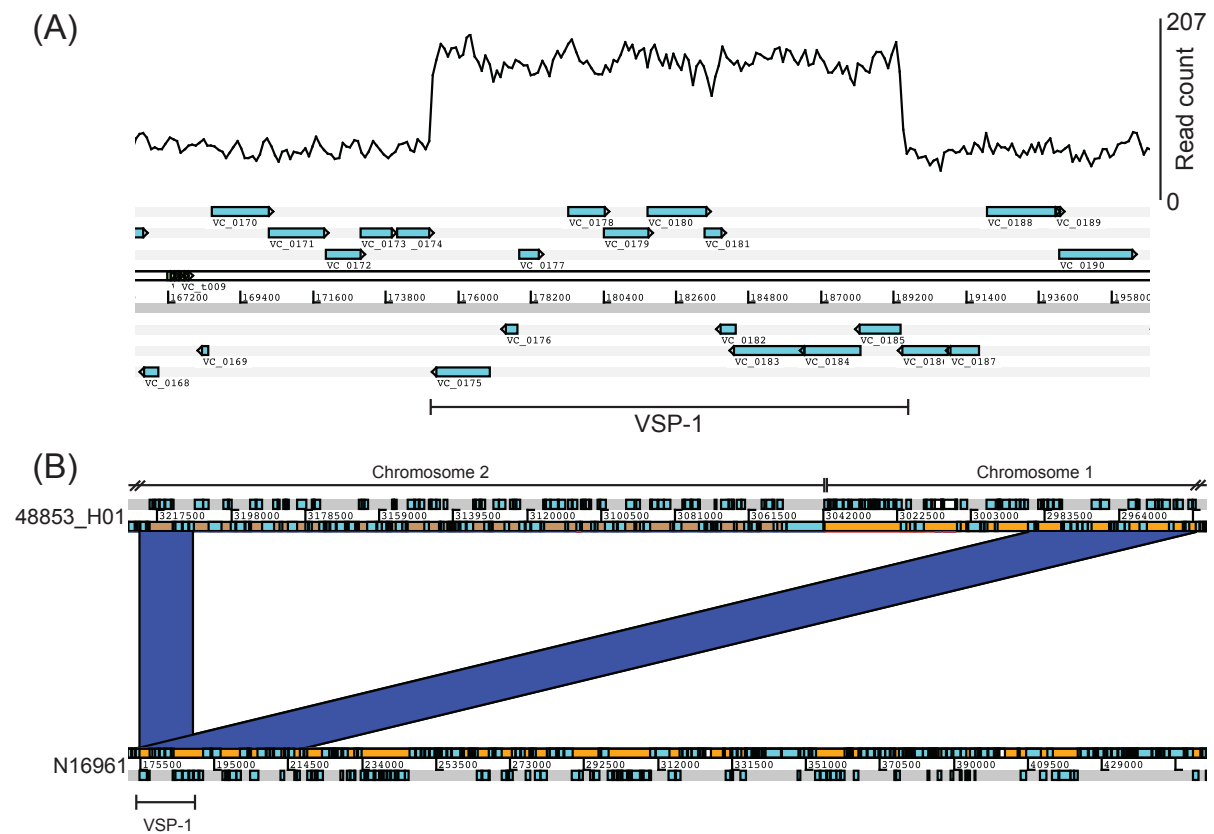

**Figure S2. Confirmation of a duplication of VSP-1 in 48853\_H01.** (A): Short reads for 48853\_H01 were mapped against the N16961 reference genome. Mapping data suggested that approximately double the number of reads mapping to VSP-1 were present relative to those mapping to the surrounding chromosome. (B): A region homologous to VSP-1 was detected on both chromosomes 1 and 2 in the 48853\_H01 assembly. Data were visualised using Artemis and BamView<sup>82,83</sup> and ACT<sup>67</sup>.

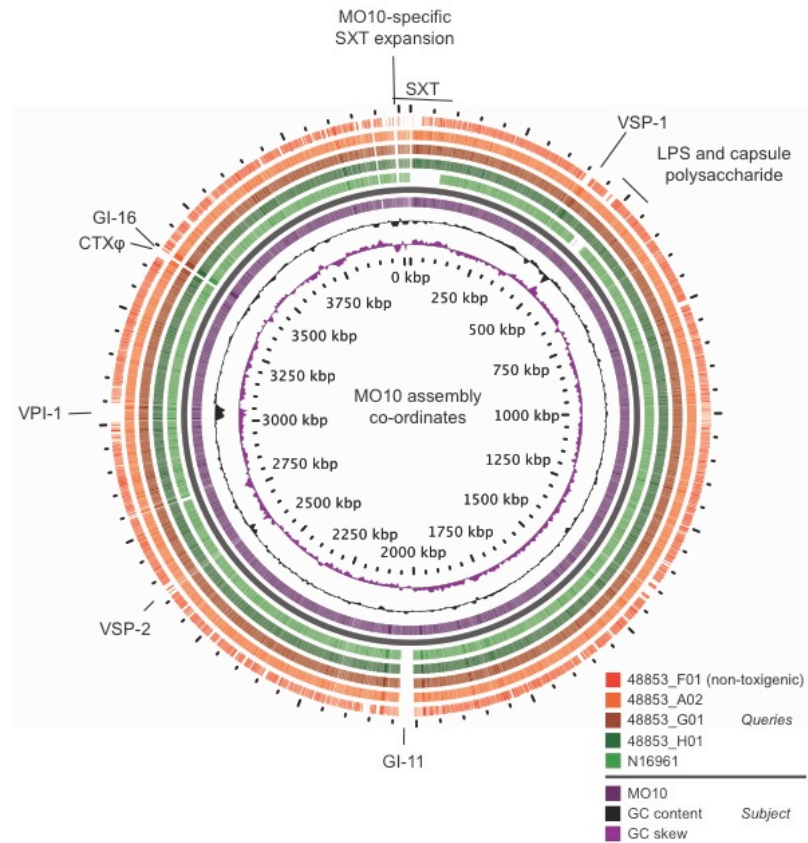

**Figure S3. BLAST atlas comparing the four closed assemblies from this study, and that of N16961, to MO10.** The loci harbouring GI-11, GI-16, and SXT are also indicated. VPI-2 is not present in the MO10 genome. MO10 harbours an expanded SXT variant. The O139 LPS and capsule-production genes are absent from N16961 (Supplementary Fig. S4). The sequences of both *V. cholerae* chromosomes (*i.e.*, all MO10 contigs) were concatenated to generate this figure.

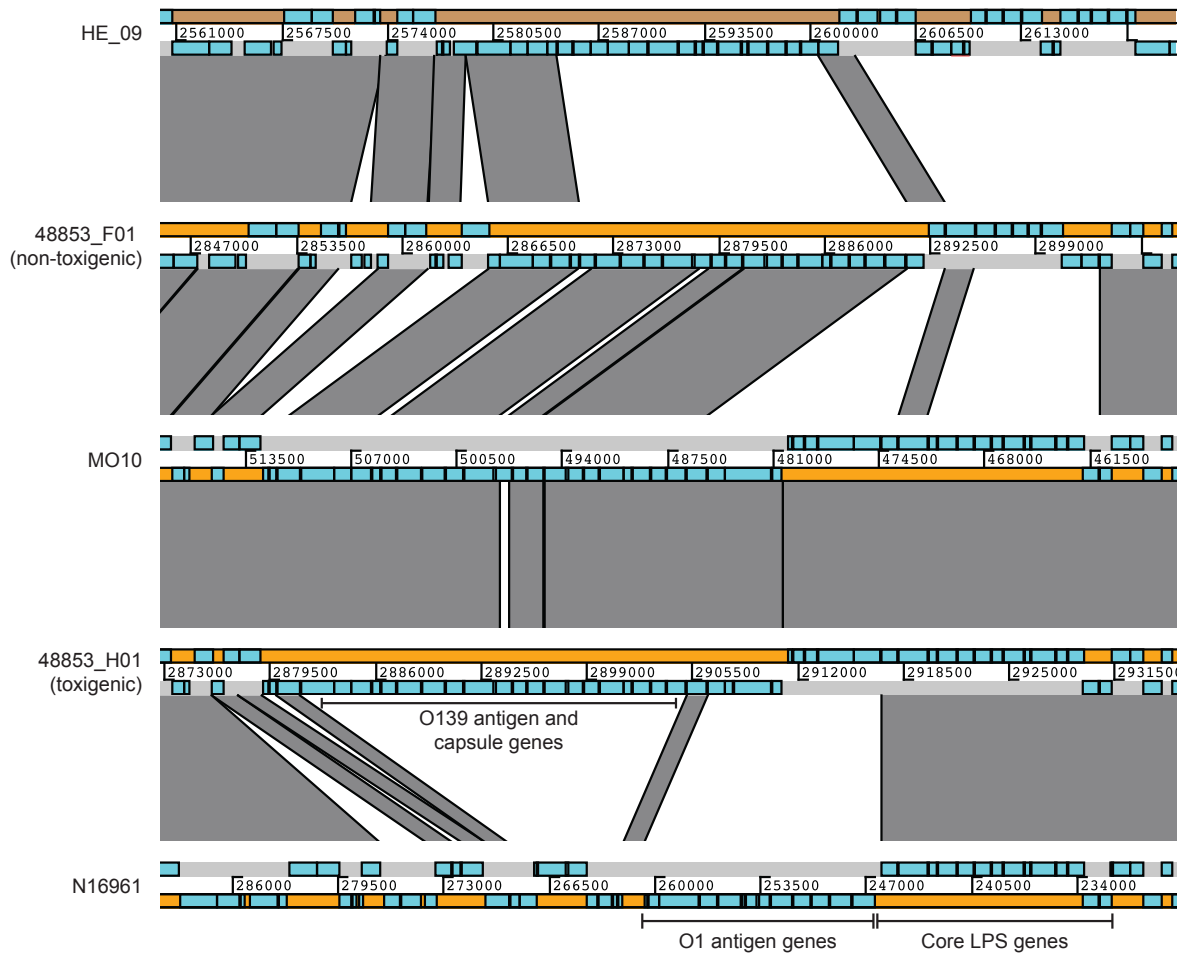

**Figure S4. Comparison of the structure of capsule and lipopolysaccharide biosynthesis loci in five *V. cholerae*.** The genes encoding the O1 antigen are absent in 48853\_H01, replaced with those encoding the O139 antigen and polysaccharide capsule. These are common to MO10, and partially conserved in the non-toxicogenic strain. Core LPS genes vary between MO10 and 48853\_F01, and O-antigen genes are not shared between 48853\_F01 and the three non-7PET *V. cholerae* to which it is most closely related (Fig. 3A), represented here by HE\_09. Syntenic regions were visualised using ACT <sup>67</sup>.

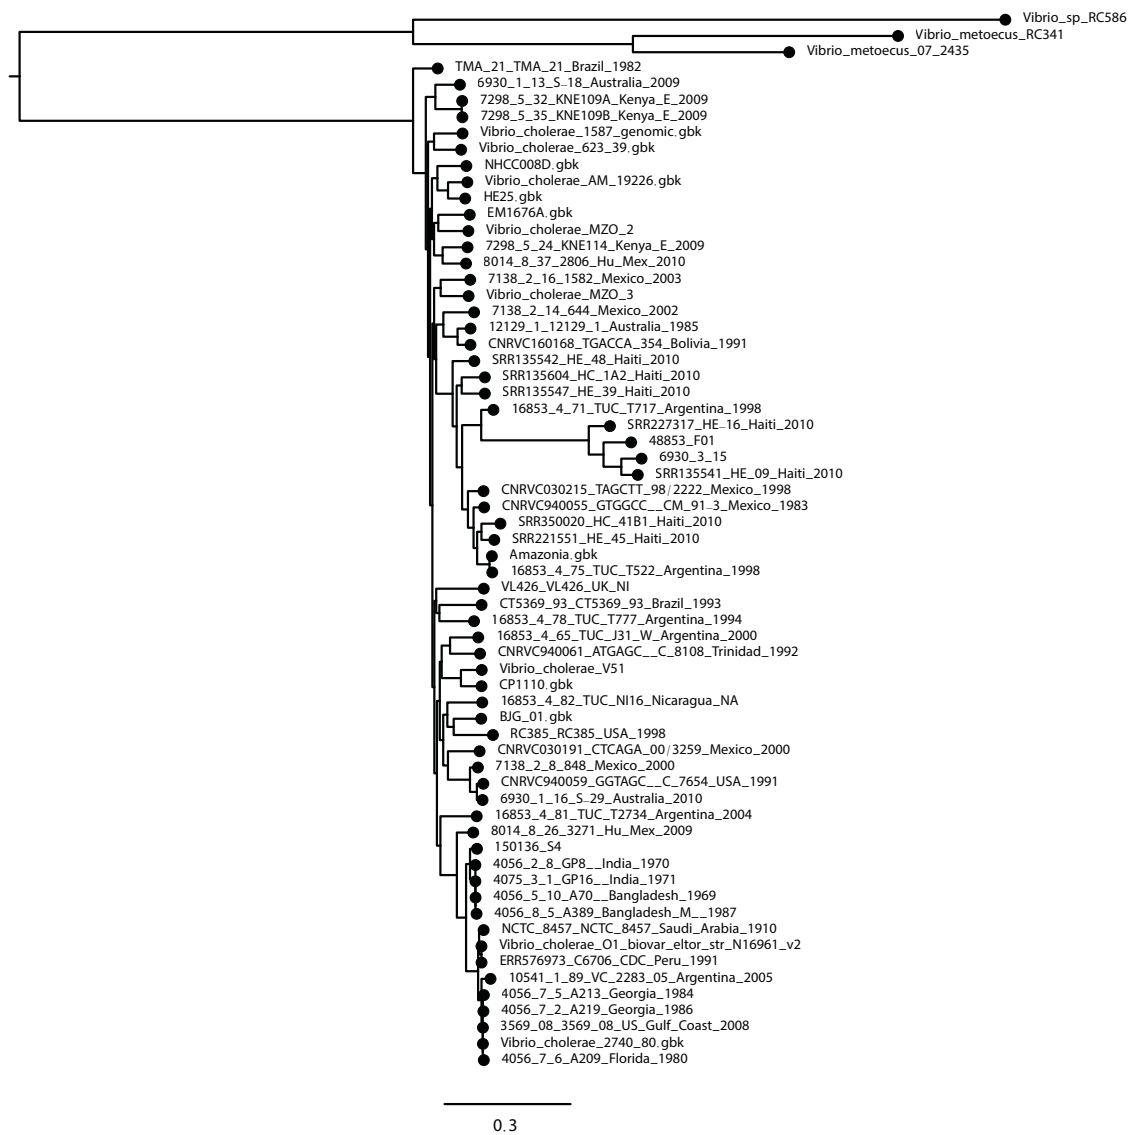

**Figure S5. Unedited *V. cholerae* species phylogeny.** The non-7PET phylogeny reported in Fig. 3A is presented without artificial branch shortening.



**Supplementary references.** Additional references for cited data and supplementary figures.

82. Rutherford, K. *et al.* Artemis: sequence visualization and annotation. *Bioinformatics* **16**, 944–945 (2000).
83. Carver, T., Böhme, U., Otto, T. D., Parkhill, J. & Berriman, M. BamView: viewing mapped read alignment data in the context of the reference sequence. *Bioinformatics* **26**, 676–677 (2010).
84. Haley, B. J. *et al.* Comparative genomic analysis reveals evidence of two novel *Vibrio* species closely related to *V. cholerae*. *BMC Microbiol.* **10**, 154 (2010).
85. Haley, B. J. *et al.* Genomic and phenotypic characterization of *Vibrio cholerae* non-O1 isolates from a US Gulf Coast cholera outbreak. *PLoS ONE* **9**, e86264 (2014).
86. Hasan, N. A. *et al.* Genomic diversity of 2010 Haitian cholera outbreak strains. *Proc. Natl. Acad. Sci.* **109**, E2010–E2017 (2012).
87. Islam, A. *et al.* Indigenous *Vibrio cholerae* strains from a non-endemic region are pathogenic. *Open Biol.* **3**, 120181 (2013).
88. Kiiru, J. *et al.* A study on the geophylogeny of clinical and environmental *Vibrio cholerae* in Kenya. *PLoS ONE* **8**, e74829 (2013).
89. Orata, F. D. *et al.* The dynamics of genetic interactions between *Vibrio metoecus* and *Vibrio cholerae*, two close relatives co-occurring in the environment. *Genome Biol. Evol.* **7**, 2941–2954 (2015).
90. Reimer, A. R. *et al.* Comparative genomics of *Vibrio cholerae* from Haiti, Asia, and Africa. *Emerg. Infect. Dis.* **17**, 2113–2121 (2011).
91. Thompson, C. C. *et al.* Genome sequence of the human pathogen *Vibrio cholerae* Amazonia. *J. Bacteriol.* **193**, 5877–5878 (2011).



92. Hendriksen, R. S. *et al.* Population genetics of *Vibrio cholerae* from Nepal in 2010: Evidence on the origin of the Haitian outbreak. *mBio* **2**, e00157-11 (2011).
93. Didelot, X. *et al.* The role of China in the global spread of the current cholera pandemic. *PLoS Genet.* **11**, e1005072 (2015).
